# Supplementary material for: A Four-Year Survey of Hemoparasites from Nocturnal Raptors (Strigiformes) Confirms a Relation between Leucocytozoon and Low Hematocrit and Body Condition Scores of Parasitized Birds
Source: MDPI journal article supplement (doi:10.3390/vetsci10010054), 2023-01-12
Supplement: s1 [file s1]

**Supplementary Table S1.** Details about distribution of the study population regarding the species, age, gender and body condition score of animals, and the year of sampling.

|                                                    | N<br>total | Age                     |                         | Gender                  |                         |                         | Body Condition Score  |                       |                         |                         |                       | Year of sampling        |                         |                         |                         |
|----------------------------------------------------|------------|-------------------------|-------------------------|-------------------------|-------------------------|-------------------------|-----------------------|-----------------------|-------------------------|-------------------------|-----------------------|-------------------------|-------------------------|-------------------------|-------------------------|
|                                                    |            | Young                   | Adult                   | Female                  | Male                    | Unknown                 | 0/5                   | 1/5                   | 2/5                     | 3/5                     | 4/5                   | 2018                    | 2019                    | 2020                    | 2021                    |
| Barn owl<br>( <i>Tyto alba</i> )                   | 90         | 72/90<br>80%            | 18/90<br>20%            | 20/90<br>22.2%          | 20/90<br>22.2%          | 50/90<br>55.6%          | 0/90<br>0%            | 0/90<br>0%            | 19/90<br>21.1%          | 71/90<br>78.9%          | 0/90<br>0%            | 11/90<br>12.2%          | 28/90<br>31.1%          | 28/90<br>31.1%          | 23/90<br>25.6%          |
| Eurasian eagle-owl<br>( <i>Bubo bubo</i> )         | 19         | 3/19<br>15.8%           | 16/19<br>84.2%          | 7/19<br>36.8%           | 5/19<br>26.4%           | 7/19<br>36.8%           | 4/19<br>21.1%         | 2/19<br>10.5%         | 10/19<br>52.6%          | 3/19<br>15.8%           | 0/19<br>0%            | 9/19<br>47.4%           | 4/19<br>21.1%           | 3/19<br>15.8%           | 3/19<br>15.8%           |
| Tawny owl<br>( <i>Strix aluco</i> )                | 10         | 1/10<br>10%             | 9/10<br>90%             | 1/10<br>10%             | 1/10<br>10%             | 8/10<br>80%             | 1/10<br>10%           | 0/10<br>0%            | 2/10<br>20%             | 7/10<br>70%             | 0/10<br>0%            | 5/10<br>50%             | 1/10<br>10%             | 2/10<br>10%             | 2/10<br>10%             |
| European owl<br>( <i>Athene noctua</i> )           | 10         | 5/10<br>50%             | 5/10<br>50%             | 2/10<br>20%             | 1/10<br>10%             | 7/10<br>70%             | 0/10<br>0%            | 1/10<br>10%           | 1/10<br>10%             | 7/10<br>70%             | 1/10<br>10%           | 8/10<br>80%             | 0/10<br>0%              | 0/10<br>0%              | 2/10<br>20%             |
| Eurasian Scops-owl<br>( <i>Otus scops</i> )        | 4          | 3/4<br>75%              | 1/4<br>25%              | 0/4<br>0%               | 0/4<br>0%               | 4/4<br>100%             | 0/4<br>0%             | 0/4<br>0%             | 0/4<br>0%               | 4/4<br>100%             | 0/4<br>0%             | 3/4<br>75%              | 1/4<br>25%              | 0/4<br>0%               | 0/4<br>0%               |
| Northern long-eared<br>owl<br>( <i>Asio otus</i> ) | 1          | 0/1<br>0%               | 1/1<br>100%             | 0/1<br>0%               | 1/1<br>100%             | 0/1<br>0%               | 0/1<br>0%             | 0/1<br>0%             | 1/1<br>100%             | 0/1<br>0%               | 0/1<br>0%             | 0/1<br>0%               | 0/1<br>0%               | 1/1<br>100%             | 0/1<br>0%               |
| <b>TOTAL</b>                                       | <b>134</b> | <b>84/134<br/>62.7%</b> | <b>50/134<br/>37.3%</b> | <b>30/134<br/>22.4%</b> | <b>28/134<br/>20.9%</b> | <b>76/134<br/>56.7%</b> | <b>5/134<br/>3.7%</b> | <b>3/134<br/>2.2%</b> | <b>33/134<br/>24.6%</b> | <b>92/134<br/>68.7%</b> | <b>1/134<br/>0.7%</b> | <b>36/134<br/>26.9%</b> | <b>34/134<br/>25.4%</b> | <b>34/134<br/>25.4%</b> | <b>30/134<br/>22.3%</b> |

N = number of raptors; % = percentage
